# Supplementary material
Source: HighWire-hosted journal article supplement (https://bmjopen.bmj.com/content/9/5/e027452)
Supplement: inline-supplementary-material-7 [file inline-supplementary-material-7.pdf]

## Supplementary File 5: Detailed Characteristics of Included Studies

| No. | Authors and date                                                                   | Country | Study aims, focus and/or research question                                                                         | Region and Setting (where specified)                                                            | Methodology and/or theoretical perspective                         | Methods and recruitment (where stated)                                                                                     | Data analysis                                             | Whole study sample                                                                                            | Eligible participants and country of origin                                       |
|-----|------------------------------------------------------------------------------------|---------|--------------------------------------------------------------------------------------------------------------------|-------------------------------------------------------------------------------------------------|--------------------------------------------------------------------|----------------------------------------------------------------------------------------------------------------------------|-----------------------------------------------------------|---------------------------------------------------------------------------------------------------------------|-----------------------------------------------------------------------------------|
| 1.  | Abdi, R. (2012) <sup>1</sup>                                                       | UK      | To determine the role of FGM/C in creating a social, individual and gendered identity for a Somali woman.          | East and Northeast regions of London.<br><br>African Well Women's Service in North London.      | Narrative and life history approach.                               | In-depth interviews.<br>Recruited women who held a strong anti-FGM/C opinion.<br><br>Snowball sampling used.               | Analysis using theoretical concept of the 'three-bodies'. | 2 gynaecologists,<br>1 counsellor and<br>1 midwife<br>16 Somali women<br>2 men<br><br>Age range 20 – 72 years | 16 Somali women                                                                   |
| 2.  | Abdullahi, A., Copping, J., Kessel, A., Luck, M., & Bonell, C. (2009) <sup>2</sup> | UK      | To explore the barriers to uptake of cervical screening and to identify strategies for overcoming these barriers.  | London boroughs, Camden UK, North London.<br><br>Somali community centre.                       | Qualitative methods                                                | Focus groups and in-depth interviews.<br><br>Recruitment from a range of settings.<br><br>Included snowball sampling.      | Thematic analysis informed by an interpretivist approach. | 50 Somali-born women<br><br>Age range 25-64 years                                                             | 50 Somali-born women                                                              |
| 3.  | Ahlberg, B. M., Krantz, I., Lindmark, G., & Warsame, M. (2004) <sup>3</sup>        | Sweden  | Questions why FGM/C persists despite eradication interventions and the migration to non-FGM/C practising areas.    | Different forums including a school, youth clinics and a girl's football team.                  | Emergent research design in the tradition of qualitative research. | Individual and group interviews.<br><br>Snowball sampling used.                                                            | Thematic analysis.                                        | 30 men, 50 women, 10 girls, 5 boys and 15 professionals                                                       | 50 women of Somali origin                                                         |
| 4.  | Ahmed, M., (2005) <sup>4</sup>                                                     | UK      | To explore the influence of cross-cultural psychology, women's experience of FGM/C and their attitudes towards it. | West, East and South London and Sheffield.<br><br>Women's homes, community centre and a mosque. | Qualitative methods                                                | Focus groups recruited via word of mouth, through attending Somali community centres and verbal advertising of the project | Thematic analysis.                                        | 56 women<br><br>Age range 18–70 years                                                                         | 56 women. The majority born in Somalia – with some born in UK and the Middle East |

| No. | Authors and date                                                                                | Country             | Study aims, focus and/or research question                                                                                                                                                                                                                                                                     | Region and Setting (where specified)                                                                     | Methodology and/or theoretical perspective                              | Methods and recruitment (where stated)                                                                                                                  | Data analysis     | Whole study sample                                     | Eligible participants and country of origin                         |
|-----|-------------------------------------------------------------------------------------------------|---------------------|----------------------------------------------------------------------------------------------------------------------------------------------------------------------------------------------------------------------------------------------------------------------------------------------------------------|----------------------------------------------------------------------------------------------------------|-------------------------------------------------------------------------|---------------------------------------------------------------------------------------------------------------------------------------------------------|-------------------|--------------------------------------------------------|---------------------------------------------------------------------|
| 5.  | Ameresekere, M., Borg, R., Frederick, J., Vragovic, O., Saia, K., & Raj, A. (2011) <sup>5</sup> | USA                 | To assess the prevalence of FGM/C in the interviewed sample, gain insight into commonly held beliefs about caesarean delivery, and understand patient perceptions of communication surrounding caesarean delivery and FGM/C by obstetric providers in the USA.                                                 | Greater Boston                                                                                           | Exploratory qualitative study                                           | Semi structured in-depth interviews<br><br>Snowball sampling and linkage with the Somali Development Centre (SDC), a local community based organization | Thematic analysis | 23 Somali immigrant women<br><br>Age range 25-52 years | 23 Somali participants                                              |
| 6.  | Asefaw, F. (2007) <sup>6</sup>                                                                  | Eritrea and Germany | To explore whether migration changes their attitude towards FGC. How do circumcised women deal with it in a society that opposes FGC? Can coherence and reasons be determined for why circumcised women subjectively suffer more in migration compared with when they live in their country of origin?         | In the migrant's homes, in clinics or as part of awareness campaigns of the woman's organisation FORWARD | Mixed methods. Survey and qualitative methods                           | Survey and semi-structured qualitative interviews.                                                                                                      | Unclear           | 420 women and 50 men<br><br>Age range 15-70 years      | 31 Eritrean migrants                                                |
| 7.  | Baldeh, F. (2013) <sup>7</sup>                                                                  | Scotland            | To explore the experiences of obstetric care in Scotland among women who have undergone FGM/C. The objectives are to explore: · How women with FGM experience obstetric care in Scotland · The role of health workers in helping or hindering communication; · Potential changes and improvements in services. | Glasgow and Edinburgh<br><br>In participants homes                                                       | Qualitative approach interpretivist paradigm and a feminist perspective | In-depth interviews.<br><br>Convenience sampling used.                                                                                                  | Thematic analysis | 7 women                                                | 7 women in total. 2 from The Gambia, 1 from Ghana and 1 from Sudan. |

| No. | Authors and date                                                                                               | Country | Study aims, focus and/or research question                                                                                                                                                                                                                             | Region and Setting (where specified)                          | Methodology and/or theoretical perspective                                                                                                                       | Methods and recruitment (where stated)                                                                                                                                                                                                                                             | Data analysis                                                                                      | Whole study sample                                                                                                                                                                                                                                                | Eligible participants and country of origin                        |
|-----|----------------------------------------------------------------------------------------------------------------|---------|------------------------------------------------------------------------------------------------------------------------------------------------------------------------------------------------------------------------------------------------------------------------|---------------------------------------------------------------|------------------------------------------------------------------------------------------------------------------------------------------------------------------|------------------------------------------------------------------------------------------------------------------------------------------------------------------------------------------------------------------------------------------------------------------------------------|----------------------------------------------------------------------------------------------------|-------------------------------------------------------------------------------------------------------------------------------------------------------------------------------------------------------------------------------------------------------------------|--------------------------------------------------------------------|
| 8.  | Ballesteros Meseguer, C., Almansa Martinez, P., Pastor Bravo, M. d. M., & Jimenez Ruiz, I. (2014) <sup>8</sup> | Spain   | To explore the perceptions of a group of women who had experienced FGM/C regarding their sexual and reproductive health, with an aim to consider the impact on their sexual relationships, pregnancy and labour, as well as the social repercussions of this practice. | Region of Murcia, Spain.<br><br>In participants' homes.       | Phenomenological qualitative study                                                                                                                               | In-depth interviews using structured open-ended approach<br><br>Informal conversations with midwives                                                                                                                                                                               | Discourse analysis                                                                                 | 9 sub-Saharan Africa women.<br><br>Mean age 30 years                                                                                                                                                                                                              | 9 women from Senegal                                               |
| 9.  | Behrendt, A. (2011) <sup>9</sup>                                                                               | Germany | To listen to the opinions, perceptions and propositions of immigrants from Sub-Saharan Africa regarding the practice of FGM/C. To develop an effective and locally adapted approach to promote the abandonment of FGM/C among immigrant groups in Hamburg.             | Hamburg                                                       | Participatory, cooperative approach which engages community members in a joint evaluation research process. Triangulated research design behaviour change model. | Mixed methods.<br><br>Qualitative and quantitative data collection from different target groups (1) key informant (health professional) interviews, (2) semi-structured individual interviews with African community members, (3) survey with community members. Snowball sampling | Qualitative data analysed and classified into themes.<br><br>Quantitative data analysed using SPSS | Total number of 1,767 participants with African migration background were interviewed for the quantitative survey<br><br>91 semi structured interviews with African community members<br><br>27 interviews with health professionals<br><br>Age range 15-83 years | 91 key informant interviews - largely from Ghana, Nigeria and Togo |
| 10. | Beine, K., Fullerton, J., Palinkas, L., & Anders, B. (1995) <sup>10</sup>                                      | USA     | to understand their cultural beliefs and behaviours better during pregnancy and to determine their attitudes toward their prenatal care experiences in San Diego,                                                                                                      | Conducted at International Rescue Committee office or private | Exploratory study                                                                                                                                                | Focus group interview.<br><br>Recruitment via community social networks                                                                                                                                                                                                            | Content analysis                                                                                   | 14 women<br><br>Age range 20 to 42 years                                                                                                                                                                                                                          | 14 Somali women                                                    |

| No. | Authors and date                                                  | Country | Study aims, focus and/or research question                                                                                                                                                                                                                             | Region and Setting (where specified)                                    | Methodology and/or theoretical perspective | Methods and recruitment (where stated)                                   | Data analysis                  | Whole study sample                                                                                                 | Eligible participants and country of origin |
|-----|-------------------------------------------------------------------|---------|------------------------------------------------------------------------------------------------------------------------------------------------------------------------------------------------------------------------------------------------------------------------|-------------------------------------------------------------------------|--------------------------------------------|--------------------------------------------------------------------------|--------------------------------|--------------------------------------------------------------------------------------------------------------------|---------------------------------------------|
|     |                                                                   |         | in order to inform providers and enhance culturally relevant service programs.                                                                                                                                                                                         | homes of group participants                                             |                                            |                                                                          |                                |                                                                                                                    |                                             |
| 11. | Berggren, V., Bergstrom, S., & Edberg, A.-K. (2006) <sup>11</sup> | Sweden  | To explore the experience of FGM and the experiences of encounters with Swedish maternal health care among women from Eritrea, Somalia, and Sudan living in Sweden.                                                                                                    | Three different cities in Sweden,<br><br>Conducted in the women's homes | Exploratory qualitative study              | 26 interviews recruited via snowball sampling or network sampling        | Latent content analysis        | 22 women, 6 from Eritrea, 11 from Somalia, and 5 from Sudan (1 excluded as no FGM)<br><br>Age range 24 to 73 years | 21 women from Eritrea, Somalia, or Sudan    |
| 12. | Betts, V. (2011) <sup>12</sup>                                    | Canada  | To critically examine popular ideas of Somali women's identity, gender and sexuality in Canada; and, to evaluate Somali women's experiences with Canadian health care professionals, and how it compares with their experiences with medical professionals in Somalia. | Greater Toronto Area, Canada. From Community Centre in a small office   | Anthropological methods                    | Individual and paired interviews one discussion group of fourteen women. | Placed loosely into categories | Thirteen women aged 18-65 years                                                                                    | 13 Somali women                             |

| No. | Authors and date                                  | Country | Study aims, focus and/or research question                                                                                                                                                                                                                                                               | Region and Setting (where specified)                                                                                                                                                                               | Methodology and/or theoretical perspective            | Methods and recruitment (where stated)                                                                                                                                                                                                                                                                  | Data analysis                                                                                                   | Whole study sample                                                                                                         | Eligible participants and country of origin               |
|-----|---------------------------------------------------|---------|----------------------------------------------------------------------------------------------------------------------------------------------------------------------------------------------------------------------------------------------------------------------------------------------------------|--------------------------------------------------------------------------------------------------------------------------------------------------------------------------------------------------------------------|-------------------------------------------------------|---------------------------------------------------------------------------------------------------------------------------------------------------------------------------------------------------------------------------------------------------------------------------------------------------------|-----------------------------------------------------------------------------------------------------------------|----------------------------------------------------------------------------------------------------------------------------|-----------------------------------------------------------|
| 13. | Bravo Pastor del Mar, M. (2014) <sup>13</sup>     | Spain   | To identify the knowledge, attitudes and experiences regarding genital mutilation of a group of women from Sub-Saharan African countries where FGM/C is a traditional practice.                                                                                                                          | Region of Murcia, Spain.<br><br>The interviews were held individually at the homes of the participants, at their request, always in the absence of the husband and occasionally in the presence of minor children. | A qualitative study using the life story method       | Life Story interviews held until data saturation was reached. Informal conversations including telephone calls, emails, informal chats and informal meetings with key informants. Socio-demographic Questionnaire<br><br>Contact through different associations for African women and snowball sampling | The analysis was carried out using the categories that emerged from the narratives collected in the interviews. | 20 Senegalese women, 2 Nigerian women and 2 Gambian women<br><br>Age range 23 - 42 years                                   | 20 Senegalese women, 2 Nigerian women and 2 Gambian women |
| 14. | Bulman, K. H., & McCourt, C. (2002) <sup>14</sup> | UK      | To develop an understanding of the reality faced by Somali women in their contacts with the maternity services in the UK and to explore professionals perceptions of Somali women and their maternity care needs - how they approached providing for these needs and their ideas for improving services. | West London<br><br>Conducted in participants homes or clinics                                                                                                                                                      | Qualitative (ethnographic context narrative approach) | 6 individual interviews and two focus groups with Somali women, recruited via snowball sampling method<br><br>2 focus groups with midwives, (caseload and hospital midwives). Individual interviews with a Somali health-link worker, a woman on the Health and Race Working                            | Thematic analysis                                                                                               | 12 Somali women participating in qualitative interviews<br><br>Health workers (number not specified) were also interviewed | 12 Somali women                                           |

| No. | Authors and date                                                                                      | Country | Study aims, focus and/or research question                                                                                                                                                                                   | Region and Setting (where specified)                                     | Methodology and/or theoretical perspective | Methods and recruitment (where stated)                                                                                                                                                                              | Data analysis                                                          | Whole study sample                                     | Eligible participants and country of origin                         |
|-----|-------------------------------------------------------------------------------------------------------|---------|------------------------------------------------------------------------------------------------------------------------------------------------------------------------------------------------------------------------------|--------------------------------------------------------------------------|--------------------------------------------|---------------------------------------------------------------------------------------------------------------------------------------------------------------------------------------------------------------------|------------------------------------------------------------------------|--------------------------------------------------------|---------------------------------------------------------------------|
|     |                                                                                                       |         |                                                                                                                                                                                                                              |                                                                          |                                            | Group, and an obstetric registrar.                                                                                                                                                                                  |                                                                        |                                                        |                                                                     |
| 15. | Carroll, J., Epstein, R., Fiscella, K., Gipson, T., Volpe, E., & Jean-Pierre, P. (2007) <sup>15</sup> | USA     | To explore the range of both Bantu and other Somali women's experiences with communication about preventive health services in the US in order to understand the role communication plays in disparities in this population. | Rochester, NY, USA. At a time and place convenient to the participant    | Grounded theory                            | Individual interviews, a Somali women's focus group was conducted to check thematic validity and clarify questions and concepts. Word of mouth, key informants and primary care provider referrals; and snowballing | Grounded theory, a coding/editing method that extracts emerging themes | 34 women Age range 18 - 53 years (median age 27 years) | 34 Somali refugee women                                             |
| 16. | Chalmers, B., & Omer-Hashi, K. (2002) <sup>16</sup>                                                   | Canada  | To explore recent perinatal experiences in Canada                                                                                                                                                                            | Greater Toronto region, at participants home                             | Unclear                                    | Sampling from community sites and snowball sampling.<br><br>Structured questionnaire with 4 open ended questions, administered face to face involving reflection and discussion                                     | Unclear                                                                | 432 Somali women<br><br>Mean age 34 years              | 415 Somali women<br><br>(who responded to the open ended questions) |
| 17. | Degni, F., Suominen, S. B., El Ansari, W., Vehviläinen-Julkunen, K., & Essen, B. (2014) <sup>17</sup> | Finland | To explore immigrant Somali women's experiences of reproductive and maternity health care services (RMHCS) and their perceptions about the service providers.                                                                | Helsinki, Vantaa, Espoo and Turku cities in Finland.<br><br>Conducted at | Exploratory, qualitative study             | Focus group discussions via purposeful sampling                                                                                                                                                                     | Guided by concepts of cultural care                                    | 70 women<br><br>Age range 18~50 years                  | 70 Somali women                                                     |

| No. | Authors and date                                                                                                                  | Country | Study aims, focus and/or research question                                                                                                                                                                                                                                                                                                                                          | Region and Setting (where specified)                                                       | Methodology and/or theoretical perspective                                                                                                                                                                 | Methods and recruitment (where stated)                                                                                                                            | Data analysis                                                   | Whole study sample                                                                                                                                   | Eligible participants and country of origin |
|-----|-----------------------------------------------------------------------------------------------------------------------------------|---------|-------------------------------------------------------------------------------------------------------------------------------------------------------------------------------------------------------------------------------------------------------------------------------------------------------------------------------------------------------------------------------------|--------------------------------------------------------------------------------------------|------------------------------------------------------------------------------------------------------------------------------------------------------------------------------------------------------------|-------------------------------------------------------------------------------------------------------------------------------------------------------------------|-----------------------------------------------------------------|------------------------------------------------------------------------------------------------------------------------------------------------------|---------------------------------------------|
|     |                                                                                                                                   |         |                                                                                                                                                                                                                                                                                                                                                                                     | woman's home and swimming pool hall                                                        |                                                                                                                                                                                                            |                                                                                                                                                                   |                                                                 |                                                                                                                                                      |                                             |
| 18. | d'Entremont, M., Smythe, L., & McAra-Couper, J. (2014) <sup>18</sup>                                                              | France  | Explored the experiences of childbirth for women who have been excised.                                                                                                                                                                                                                                                                                                             | At a place of the woman's choosing                                                         | Hermeneutic phenomenology<br>Gadamerian philosophy                                                                                                                                                         | Interviews<br>Purposive sampling methods                                                                                                                          | Constant, circular process of thematic, textual interpretations | 4 women                                                                                                                                              | 4 women from different countries            |
| 19. | Essén, B., Johnsdotter, S., Hovellius, B., Gudmundsson, S., Sjöberg, N. O., Friedman, J., & Östergren, P. O. (2000) <sup>19</sup> | Sweden  | To explore the attitudes, strategies and habits of Somalian immigrant women related to pregnancy and childbirth, in order to gain an understanding as to how cultural factors might affect perinatal outcome.                                                                                                                                                                       | Localities of the different Somalian immigrant associations in their own residential areas | Qualitative                                                                                                                                                                                                | Qualitative in-depth interviews. Recruited from community organisations                                                                                           | Systematic textual analysis                                     | 15 women<br>Age range 20-55 years                                                                                                                    | 15 Somali women                             |
| 20. | Fawcett, L., (2014) <sup>20</sup>                                                                                                 | USA     | To identify and measure patterns of cultural knowledge and variations (cross-cultural agreement and disagreement) between Somali resettled refugee women (SRRW) and healthcare providers (HCP) on childbearing models. To investigate and measure intra-cultural variations in the domain of childbearing knowledge among Somali resettled refugee women. To explore the subjective | Arizona Metropolitan Phoenix area, in a café or participants' homes                        | Quantitative survey and ethnographic methodologies and phenomenological approaches using open-ended semi-structured interviews.<br><br>Used theory of Cultural Consensus Model and concepts of embodiment. | Culture consensus questionnaire (CCM), participatory observations, in-depth semi-structured interviews.<br><br>Used snowball sampling via community organisations | Phenomenological analysis and inductive explorative approach    | Questionnaires (N=174)<br><br>Interviews; Somali resettled refugee women (SRRW, n=30); Healthcare Providers (HCP, n=10)<br><br>Age range 18-70 years | 30 Somali resettled refugee women           |

| No. | Authors and date                                                                                                  | Country | Study aims, focus and/or research question                                                                                                                                                                   | Region and Setting (where specified)                          | Methodology and/or theoretical perspective                                                            | Methods and recruitment (where stated)                                                                            | Data analysis                                             | Whole study sample                                           | Eligible participants and country of origin      |
|-----|-------------------------------------------------------------------------------------------------------------------|---------|--------------------------------------------------------------------------------------------------------------------------------------------------------------------------------------------------------------|---------------------------------------------------------------|-------------------------------------------------------------------------------------------------------|-------------------------------------------------------------------------------------------------------------------|-----------------------------------------------------------|--------------------------------------------------------------|--------------------------------------------------|
|     |                                                                                                                   |         | and intersubjective perceptions of female circumcision.                                                                                                                                                      |                                                               |                                                                                                       |                                                                                                                   |                                                           |                                                              |                                                  |
| 21. | Gali, M. A. (1997) <sup>21</sup>                                                                                  | USA     | To explore the relationship between the psychological and medical concerns circumcised women face and barriers to reproductive health care delivery in the United States.                                    | San Francisco Bay Area.                                       | Qualitative exploratory research                                                                      | Semi-structured interviews were conducted in person and by mail.<br><br>Recruitment using community organisations | Content analysis                                          | 26 women<br><br>Aged 21 -45 years                            | 26 women from Sudan, Eritrea, Ethiopia and Egypt |
| 22. | Ghebre, R. G., Sewali, B., Osman, S., Adawe, A., Nguyen, H. T., Okuyemi, K. S., & Joseph, A. (2015) <sup>22</sup> | USA     | Exploring suitable language, structure, and context to describe cervical cancer prevention and screening methods among women in Minnesota's Somali community.                                                | Minnesota<br><br>Community locations                          | Qualitative study with community engagement socio-ecological framework                                | Informant interviews. Used snowball sampling.                                                                     | Themes and subthemes using the socio-ecological framework | 23 participants<br><br>Age range 26-45 years                 | 23 Somali women                                  |
| 23. | Glazer, E., (2012) <sup>23</sup>                                                                                  | Canada  | Aimed to explore this possibly primarily through subjective reports of pain discussing testable pain along with interpretation and meaning of bodily pain and FGM/C from the perspective of women with FGM/C | Greater Toronto Area, Canada at community health centre (CHC) | Mixed-methods, including a qualitative component drawing upon interpretive and embodied phenomenology | Qualitative interview semi-structured interviews using a convenience sample                                       | Phenomenological analysis                                 | 14 Somali-Canadian participants<br><br>Age range 21-46 years | 14 Somali-Canadian participants                  |

| No. | Authors and date                                                          | Country                   | Study aims, focus and/or research question                                                                                                                                                                                                                | Region and Setting (where specified)                                    | Methodology and/or theoretical perspective                                                 | Methods and recruitment (where stated)                                                                                                                                   | Data analysis                                  | Whole study sample                                                                                                                           | Eligible participants and country of origin                                                           |
|-----|---------------------------------------------------------------------------|---------------------------|-----------------------------------------------------------------------------------------------------------------------------------------------------------------------------------------------------------------------------------------------------------|-------------------------------------------------------------------------|--------------------------------------------------------------------------------------------|--------------------------------------------------------------------------------------------------------------------------------------------------------------------------|------------------------------------------------|----------------------------------------------------------------------------------------------------------------------------------------------|-------------------------------------------------------------------------------------------------------|
| 24. | Glover, J., Liebling, H., Barrett, H., & Goodman, S. (2017) <sup>24</sup> | UK                        | Investigate the experiences of women who had undergone FGM and the psychological effects they had experienced. It also sought to understand the psychological impact of physical health complications, survivor's resilience and their cultural context   | Multiple UK settings                                                    | A qualitative methodology of grounded theory Principles of feminist research were observed | In-depth interviews from a non-probability convenience sampling frame based on snowballing sampling                                                                      | Theoretical memos and grounded theory analysis | 20 women survivors of FGM<br><br>Mean age 38 years (SD=6.5, range=25-51)                                                                     | 20 women from various countries Somalia (n=10), Kenya (n=2), South Africa (n=6), and The Gambia (n=2) |
| 25. | Guerin, P. B., Allotey, P., Elmi, F. H., & Baho, S. (2006) <sup>25</sup>  | Australia and New Zealand | To enhance the understanding of the immigration experience on the reproductive health of women from Horn of African and Middle Eastern countries resident in Victoria to provide a safe means by which Somali women could express their views about FGM/C | Melbourne Australia and New Zealand.<br><br>In homes of the participant | Ethnographic cohort design Community-Based Participatory Research                          | In-depth, open-ended and unstructured interviews, focus group discussions and participant observation. Sampling involved using community networks and snowball approach. | Thematic analysis                              | Australia (n = 255) and New Zealand (n = 64). African women in the sample (n = 141) Middle Eastern women (n = 114) 54 women; 19 and 50 years | 10 women from Somalia, Ethiopia, Eritrea, Sudan and Nigeria                                           |
| 26. | Hill, N., Hunt, E., & Hyrkas, K. (2012) <sup>26</sup>                     | USA                       | To describe and better understand Somali immigrant women's health care experiences and beliefs regarding pregnancy and birth in the Unites States.                                                                                                        | North-eastern United States<br><br>Setting not given                    | Qualitative study                                                                          | Focus group convenience sampling and women in turn identified friends and family                                                                                         | Thematic content analysis                      | 18 participants<br><br>Age range 27-42 years                                                                                                 | 18 Somali women                                                                                       |
| 27. | Hussein, E., (2010) <sup>27</sup>                                         | UK                        | To gain an in-depth understanding of some of the experiences and perceptions of women coming from countries with high prevalence rates of FGM/C living in Bristol.                                                                                        | Setting not given                                                       | Participatory Ethnographic Evaluation and Research (PEER) and tenets of social construct   | Informal in-depth interviews in third person loosely structured interviews. Equipping members from the community to become 'PEER researchers                             | Not stated                                     | 8 adult women                                                                                                                                | 8 Somali and Sudanese adult women                                                                     |

| No. | Authors and date                    | Country        | Study aims, focus and/or research question                                                                                                                                                                                                                                  | Region and Setting (where specified)                                                                                         | Methodology and/or theoretical perspective                          | Methods and recruitment (where stated)                                                                                                                       | Data analysis                                  | Whole study sample                                                           | Eligible participants and country of origin        |
|-----|-------------------------------------|----------------|-----------------------------------------------------------------------------------------------------------------------------------------------------------------------------------------------------------------------------------------------------------------------------|------------------------------------------------------------------------------------------------------------------------------|---------------------------------------------------------------------|--------------------------------------------------------------------------------------------------------------------------------------------------------------|------------------------------------------------|------------------------------------------------------------------------------|----------------------------------------------------|
| 28. | Hussen, M. A. (2014) <sup>28</sup>  | New Zealand    | To understand the situation of both the Christchurch women with FGM and their health providers, in order to increase knowledge of FGM and ensure improved health services for women with this condition.                                                                    | Christchurch, New Zealand, at community gatherings                                                                           | Qualitative descriptive research methods                            | Focus group approach for women from East Africa known to the social worker and researcher<br><br>Individual interviews with health professionals             | Thematic analysis                              | 20 focus group participants – mean age 21-65 years<br><br>3 health providers | 20 women from Eritrea, Ethiopia, Somalia and Sudan |
| 29. | Johansen, R.E. (2017) <sup>29</sup> | Norway         | Explores experiences and perceptions of premarital deinfibulation. It explores whether Somali and Sudanese men and women understand deinfibulation as a purely medical issue or whether their use of the services is also affected by the cultural meaning of infibulation. | Oslo and other villages and towns in Norway. From participant home, workplace or public space such as a coffee bar or a park | Qualitative study                                                   | In-depth and key informant interviews<br>Participant observation<br>validation seminars. Utilised Snowball sampling                                          | Themes and patterns                            | 23 women and 13 men<br><br>Age range 18-65 years                             | 23 Somali and Sudanese women                       |
| 30. | Jones, A. (2010) <sup>30</sup>      | UK             | To understand the experiences and views of women who had undergone female genital mutilation (FGM/C).                                                                                                                                                                       | South England, UK, in participant own home or the community centre                                                           | Interpretative phenomenological analysis (IPA) relativist approach. | Semi-structured interview. Recruited from FORWARD, community group                                                                                           | Interpretative Phenomenological Analysis (IPA) | Six participants<br><br>Age range 19-45 years                                | 6 participants from Sudan and Somalia              |
| 31. | Khaja, K. (2004) <sup>31</sup>      | Canada and USA | To describe their experiences with circumcision and to share the personal and cultural meanings of those experiences                                                                                                                                                        | Toronto, Canada, and Salt Lake City, Utah. Setting not stated.                                                               | Life history methodology / ethnographic                             | Face-to-face, individual life history interviews. Purposive sampling recruited with the assistance of targeted Somali community members or service providers | Content analysis                               | 17 women<br><br>Age range 20-79 years                                        | 17 Somali women                                    |

| No. | Authors and date                                         | Country        | Study aims, focus and/or research question                                                                                                                                                                                                                               | Region and Setting (where specified)                                                         | Methodology and/or theoretical perspective  | Methods and recruitment (where stated)                                                                   | Data analysis              | Whole study sample                                   | Eligible participants and country of origin |
|-----|----------------------------------------------------------|----------------|--------------------------------------------------------------------------------------------------------------------------------------------------------------------------------------------------------------------------------------------------------------------------|----------------------------------------------------------------------------------------------|---------------------------------------------|----------------------------------------------------------------------------------------------------------|----------------------------|------------------------------------------------------|---------------------------------------------|
| 32. | Khaja, K., Lay, K., & Boys, S. (2010) <sup>32</sup>      | Canada and USA | Examined the lives of Somali Muslim women who were circumcised.                                                                                                                                                                                                          | Ontario Canada and Salt Lake City, Utah North America Setting N/S                            | Exploratory qualitative                     | Face-to-face interviews                                                                                  | Not stated                 | 17 circumcised Somali women<br>Age range 20-79 years | 17 circumcised Somali women                 |
| 33. | Lundberg, P. C., & Gerezgiher, A. (2008) <sup>33</sup>   | Sweden         | to explore the experiences from pregnancy and childbirth related to FGM/C among Eritrean immigrant women                                                                                                                                                                 | At informants' homes or in a separate room                                                   | Ethnographic method                         | Semi-structured and open-ended in-depth interview<br>Purposive sampling with snowball sampling technique | Thematic analysis          | 15 women<br>Age range 31-45 years                    | 15 Eritrean women                           |
| 34. | Maier, C. (2003) <sup>34</sup>                           | Austria        | Three questions:<br>· How did the affected woman experience and handle her genital mutilation when she was a girl? How did this influence her life and what are the physical and mental consequences?<br>· In the context of FGM: Did immigration add new problem areas? | Not stated                                                                                   | Qualitative research                        | Guided interviews with a relatively open design                                                          | Not stated                 | 3 women                                              | 3 women from different countries            |
| 35. | Maternity Action. (2014) <sup>35</sup>                   | UK             | To explore potential barriers to healthcare, both for women in general, and for women who experience comparatively poor health outcomes, in order to contribute to an understanding of how these may be addressed                                                        | Leeds, Manchester and London, UK. Community groups were hosted and facilitated Organisations | Online survey, and a series of focus groups | Focus groups recruited from service user networks                                                        | Themes from the literature | 261 in the survey<br>23 women in focus groups.       | 23 women from several countries             |
| 36. | McNeely, S., & Christie-de Jong, F. (2016) <sup>36</sup> | USA            | To explore perspectives of Somali refugees on FGM/C and potential changes in, these after migration to the USA.                                                                                                                                                          | Denver metropolitan area, USA in participants' homes                                         | Descriptive, socio-cultural study           | Semi-structured and open-ended interviews<br>snowball sampling with two gatekeepers                      | Thematic content analysis  | 13 Somali refugees<br>Age range 20-70 years          | 13 Somali women                             |

| No. | Authors and date                                                               | Country   | Study aims, focus and/or research question                                                                                                                                           | Region and Setting (where specified)                                     | Methodology and/or theoretical perspective                                                                             | Methods and recruitment (where stated)                                                                           | Data analysis                       | Whole study sample                                                                                                                       | Eligible participants and country of origin                                                                        |
|-----|--------------------------------------------------------------------------------|-----------|--------------------------------------------------------------------------------------------------------------------------------------------------------------------------------------|--------------------------------------------------------------------------|------------------------------------------------------------------------------------------------------------------------|------------------------------------------------------------------------------------------------------------------|-------------------------------------|------------------------------------------------------------------------------------------------------------------------------------------|--------------------------------------------------------------------------------------------------------------------|
| 37. | Moxey, J. M., & Jones, L. L. (2016) <sup>37</sup>                              | UK        | To explore how Somali women exposed to FGM, experience and perceive antenatal and intrapartum care in England                                                                        | Birmingham, West Midlands<br><br>In a private room at a community centre | Descriptive qualitative methodology                                                                                    | Semi-structured Face-to-face interviews purposively sampled from community centres and using a snowball approach | Inductive thematic analysis         | 10 women<br><br>Age range 20-49 years                                                                                                    | 10 Somali women                                                                                                    |
| 38. | Murray, L., Windsor, C., Parker, E., & Tewfik, O. (2010) <sup>38</sup>         | Australia | To uncover first-person descriptions of the birth experiences of African refugee women in Brisbane, Australia, and to explore the common themes that emerged from their experiences. | In room at a clinic or in participant own homes                          | Phenomenology<br>Husserlian phenomenological framework.                                                                | Semi structured interviews purposeful, snowball strategy                                                         | Giorgi's phenomenological analysis. | 10 women<br><br>Age range 20-40 years                                                                                                    | 10 women from Sudan<br>Liberia<br>Ethiopia<br>Somalia                                                              |
| 39. | Norman, K., Gegzabher, S. B., & Otoo-Oyortey, N. (2016) <sup>39</sup>          | UK        | Rapid participatory study amongst migrant communities in Norfolk and Essex, to help shed more light on this issue and to support their community engagement programme.               | Norfolk, and Essex, in the community                                     | Participatory Ethnographic Evaluation and Research (PEER)<br>PEER is a qualitative, participatory research methodology | Interviews using snowball sampling                                                                               | Participatory thematic analysis     | 18 peer researchers and 33 interviewees (each of the peer researchers chose two friends/peers to interview)                              | 33 women from various countries                                                                                    |
| 40. | Norman, K., Hemmings, J., Hussein, E., & Otoo-Oyortey, N. (2009) <sup>40</sup> | UK        | To gain in-depth insights from women originally from high-prevalence FGM countries, and currently living in and around Westminster.                                                  | Borough of Westminster, London in the community                          | Participatory Ethnographic Evaluation and Research (PEER) a qualitative, participatory research method                 | In-depth conversational interviews snowball sampling used                                                        | Participatory thematic analysis     | 10 peer researchers conducted interviews with 3 friends each (n=30). Peer researchers were also interviewed.<br><br>Age range 25 years + | 40 women<br><br>(10 peer researchers who were also interviewed and 30 other women) from Sudan, Eritrea and Somalia |

| No. | Authors and date                                                                     | Country  | Study aims, focus and/or research question                                                                                                                                                                                                                          | Region and Setting (where specified)              | Methodology and/or theoretical perspective                                             | Methods and recruitment (where stated)                                                                              | Data analysis                   | Whole study sample                                                                         | Eligible participants and country of origin                                                                                        |
|-----|--------------------------------------------------------------------------------------|----------|---------------------------------------------------------------------------------------------------------------------------------------------------------------------------------------------------------------------------------------------------------------------|---------------------------------------------------|----------------------------------------------------------------------------------------|---------------------------------------------------------------------------------------------------------------------|---------------------------------|--------------------------------------------------------------------------------------------|------------------------------------------------------------------------------------------------------------------------------------|
| 41. | O'Brien, O., Baldeh, F., Hassan, J., & Baillie, M. (2017) <sup>41</sup>              | Scotland | To facilitate community engagement with FGM affected populations, to enable their voices to contribute to the development of awareness raising around FGM and to ensuring culturally appropriate FGM services for Scotland.                                         | Glasgow and Edinburgh Scotland, in the community  | Participatory Ethnographic Evaluation Research (PEER) ethnographic research principles | Interviews with contacts in community-based organisations and friends                                               | Participatory analysis          | 19 peer researchers (who were also interviewed) and who then carried out 29 interviews     | 48 women<br><br>(19 peer researchers who were also interviewed and 29 women) from Sudan<br>Nigeria<br>Zimbabwe                     |
| 42. | O'Brien, O., Baldeh, F., Sivapatham, S., Brown, E., & O'May, F. (2016) <sup>42</sup> | Scotland | To facilitate community engagement on FGM with women, men, young people and religious leaders to enable their voices to be heard and contribute to the development of awareness raising around FGM as well as ensuring culturally appropriate services for Scotland | Glasgow and Edinburgh Scotland, in the community, | Participatory Ethnographic Evaluation Research (PEER) ethnographic research principles | Interviews and focus groups. Convenience and snowball sampling through contacts                                     | Participatory analysis          | 28 peer researchers (12 women, 16 men) who carried out 78 interviews                       | 39 women<br><br>(9 female peer researchers who were also interviewed and 30 women) from 17 African countries                       |
| 43. | Palfreyman, A., Brown, E., & Nam, S. (2011) <sup>43</sup>                            | UK       | To explore FGM within the context of Birmingham.                                                                                                                                                                                                                    | Birmingham                                        | Participatory Ethnographic Evaluation and Research (PEER)                              | In-depth semi-structured interviews with and by peers recruited using community organisations and snowball sampling | Participatory thematic analysis | Fifteen peer researchers conducted a total of 90 interviews<br><br>Age range 17 - 48 years | 105 women<br><br>(15 peer researchers who were also interviewed, and 90 women) from Somali, Eritrea, Sudan, Sierra Leon and Gambia |

| No. | Authors and date                                                        | Country     | Study aims, focus and/or research question                                                                                                                                                                                        | Region and Setting (where specified)                             | Methodology and/or theoretical perspective                                                                                                                                                                    | Methods and recruitment (where stated)                                                                                                                                                   | Data analysis                                                                    | Whole study sample                                                                                                                             | Eligible participants and country of origin |
|-----|-------------------------------------------------------------------------|-------------|-----------------------------------------------------------------------------------------------------------------------------------------------------------------------------------------------------------------------------------|------------------------------------------------------------------|---------------------------------------------------------------------------------------------------------------------------------------------------------------------------------------------------------------|------------------------------------------------------------------------------------------------------------------------------------------------------------------------------------------|----------------------------------------------------------------------------------|------------------------------------------------------------------------------------------------------------------------------------------------|---------------------------------------------|
| 44. | Recchia, N., & McGarry, J. (2017) <sup>44</sup>                         | UK          | The overall aim of the study was to develop and facilitate a participant led arts-based workshop with women who were survivors of FGM in order to explore their experiences and the impact of FGM on their health and well-being. | Nottingham<br><br>At a local FGM specialist support organisation | Creative narrative approach which included the sharing of personal stories, the creation of pottery models and the sharing of artefacts - arts-based research approach using a feminist theoretical framework | The composition of the workshop essentially encompassed two main strands: the creation of a persona and sharing artefacts. Recruited through a local FGM specialist support organisation | Narrative approach                                                               | Six women agreed to take part in the project<br><br>Age range 25-51 years                                                                      | 6 women from Kenya, Nigeria and Ethiopia    |
| 45. | Safari, F., (2013) <sup>45</sup>                                        | UK          | Explored women's experience of deinfibulation and its aftermath.                                                                                                                                                                  | London<br><br>At NHS hospital, or participant's home             | Qualitative approach<br>Interpretive Phenomenological Analysis (IPA)                                                                                                                                          | Semi-structured interview                                                                                                                                                                | Interpretive Phenomenological Analysis (IPA)                                     | 9 women<br><br>Age range 19-44 years                                                                                                           | 9 women from Somalia Eritrea                |
| 46. | Salad, J., Verdonk, P., de Boer, F., & Abma, T. A. (2015) <sup>46</sup> | Netherlands | To explore the perceptions of Somali women living in the Netherlands regarding measures to prevent cervical cancer                                                                                                                | In cafés, libraries, schools, and community centres              | Qualitative approach<br>Intersectionality is therefore integrated in the HBM in this study                                                                                                                    | Semi-structured interviews, group discussions, recruited through Purposive sampling using Snowball sampling                                                                              | Framework of intersectionality enabled a comprehensive thematic content analysis | Interviews with 14 young women (aged 17-21) and 6 older women (mothers aged 30-46)<br><br>Group discussions with 26 women (mothers aged 23-66) | 46 Somali women                             |

| No. | Authors and date                                              | Country | Study aims, focus and/or research question                                                                                                                                                                                                                                                                                                                                                       | Region and Setting (where specified)                                                                           | Methodology and/or theoretical perspective  | Methods and recruitment (where stated)                                                                    | Data analysis     | Whole study sample                                                                                         | Eligible participants and country of origin         |
|-----|---------------------------------------------------------------|---------|--------------------------------------------------------------------------------------------------------------------------------------------------------------------------------------------------------------------------------------------------------------------------------------------------------------------------------------------------------------------------------------------------|----------------------------------------------------------------------------------------------------------------|---------------------------------------------|-----------------------------------------------------------------------------------------------------------|-------------------|------------------------------------------------------------------------------------------------------------|-----------------------------------------------------|
| 47. | Shaw, E. (1985) <sup>47</sup>                                 | USA     | To 1) provide a summary of basic information about female circumcision; 2) summarize the results of an exploratory study which identified special needs and concerns of circumcised women who have used the western medical system while living in the United States, and 3) identify problems and concerns student health care providers have encountered while caring for this group of women. | Southwestern University town. Setting not stated.                                                              | Exploratory study                           | Informal interviews                                                                                       | Thematic analysis | 12 circumcised women<br>Six Planned Parenthood Centres and four obstetric gynaecological clinics responded | 12 circumcised women from Sudan, Egypt, and Somalia |
| 48. | Shermarke, M.A.A. (1996) <sup>48</sup>                        | Canada  | Explores female circumcision within the Canadian community perspective                                                                                                                                                                                                                                                                                                                           | Montreal, Quebec and Ottawa, Ontario.<br><br>In homes of the interviewees or in selected, quiet, public places | Case study and Qualitative methods          | Individual interviews selected through personal contacts                                                  | Thematic analysis | 4 interviewees from Montreal and 4 from Ottawa<br><br>Age range 16 - 58 years                              | 8 Somali women                                      |
| 49. | Straus, L., McEwen, A., & Hussein, F. M. (2009) <sup>49</sup> | UK      | To examine cultural and social aspects of childbirth, and to determine how they intersect with the needs and experiences of Somali women in the UK. To explore the experiences and needs of Somali women in the UK during pregnancy and childbirth.                                                                                                                                              | London<br><br>In the community                                                                                 | Ethnographic approach<br>narrative approach | In-depth narrative interviews<br><br>Recruitment from two community Somali women's groups and snowballing | Thematic analysis | 8 Somali women<br><br>Age range 23-57 years                                                                | 8 Somali women                                      |

| No. | Authors and date                                                                                  | Country     | Study aims, focus and/or research question                                                                                                                                                                                | Region and Setting (where specified)                             | Methodology and/or theoretical perspective            | Methods and recruitment (where stated)                                                                                                                                                           | Data analysis             | Whole study sample                                                                                                              | Eligible participants and country of origin |
|-----|---------------------------------------------------------------------------------------------------|-------------|---------------------------------------------------------------------------------------------------------------------------------------------------------------------------------------------------------------------------|------------------------------------------------------------------|-------------------------------------------------------|--------------------------------------------------------------------------------------------------------------------------------------------------------------------------------------------------|---------------------------|---------------------------------------------------------------------------------------------------------------------------------|---------------------------------------------|
| 50. | Thierfelder, C. (2003) <sup>50</sup>                                                              | Switzerland | To analyse the specific situation of genitally mutilated African immigrant women, and the health care providers who encounter them in the Swiss health care system.                                                       | Cantons of Geneva, Vaud and Zurich.<br><br>Setting not stated    | Qualitative research.                                 | Semi-structured, in-depth interviews and focus group discussions.<br><br>Utilised purposive sampling and snowball sampling drawing on contacts with migrant-support and community organisations. | Thematic content analysis | Women (n=29) and men (n=3) (n=37) with Swiss health care providers (20 physicians and 17 midwives)<br><br>Age range 17-64 years | 29 women from Somalia and Eritrea           |
| 51. | Thierfelder, C., Tanner, M., & Bodiang, C. M. K. (2005) <sup>51</sup>                             | Switzerland | To analyse how immigrant women with FGM experience gynaecological/obstetrical care in the Swiss health care system, and to investigate if physicians and midwives treat and counsel FGM related complications adequately. | Zurich, Lausanne and Geneva, Switzerland.<br>Setting not stated. | Qualitative methods.                                  | Four focus group discussions and interviews.<br><br>Purposive sampling via migrant-support and community organisations.                                                                          | Unclear                   | 29 women<br>37 health care professionals                                                                                        | 29 women from Somalia and Eritrea           |
| 52. | Upvall, M. J., Mohammed, K., & Dodge, P. D. (2009) <sup>52</sup>                                  | USA         | To explore the healthcare perspectives of Somali Bantu refugees in relation to their status as women who have been circumcised and recently resettled in the US.                                                          | South-western Pennsylvania, at a local refugee centre            | Qualitative study                                     | Focus groups purposive sample identified by a local non-profit organization                                                                                                                      | Thematic analysis         | 23 resettled Somali women, a local female physician<br><br>Age range 19-43 years                                                | 23 resettled Somali women                   |
| 53. | Vangen, S., Johansen, R. E. B., Sundby, J., Traeen, B., & Stray-Pedersen, B. (2004) <sup>53</sup> | Norway      | To explore how perinatal care practice may influence labour outcomes among circumcised women                                                                                                                              | At women's homes or public cafes, or hospital                    | Qualitative method drawing on theories of empowerment | In-depth interviews. Recruited from Somali's association and in health facilities and through snowball sampling                                                                                  | Thematic analysis         | 23 Somali immigrants and 36 Norwegian health care professionals;<br><br>Age range 18-55 years                                   | 23 Somali women                             |

| No. | Authors and date                                                                                         | Country     | Study aims, focus and/or research question                                                                                                                                                                                                                                                       | Region and Setting (where specified)                                                                                               | Methodology and/or theoretical perspective                                                                                                    | Methods and recruitment (where stated)                                                                                                                                                                                               | Data analysis               | Whole study sample                                                                 | Eligible participants and country of origin                     |
|-----|----------------------------------------------------------------------------------------------------------|-------------|--------------------------------------------------------------------------------------------------------------------------------------------------------------------------------------------------------------------------------------------------------------------------------------------------|------------------------------------------------------------------------------------------------------------------------------------|-----------------------------------------------------------------------------------------------------------------------------------------------|--------------------------------------------------------------------------------------------------------------------------------------------------------------------------------------------------------------------------------------|-----------------------------|------------------------------------------------------------------------------------|-----------------------------------------------------------------|
| 54. | Vaughan, C., White, N., Keogh, L., Tobin, J., Ha, B., Ibrahim, M., & Bayly, C. (2014) <sup>54</sup>      | Australia   | To improve understanding of the impacts of FGC and to make suggestions for service development - by engaging with local women, communities and health providers                                                                                                                                  | North Yarra Carlton, Collingwood and Fitzroy<br><br>Research conducted in community centre meeting rooms.                          | Community based qualitative approach                                                                                                          | 8 focus group discussions, 4 small group discussions, 10 individual interviews with community members.<br>Recruitment from community consultations, community organisations and networks<br><br>11 interviews with service providers | Thematic analysis           | 123 individuals<br><br>112 migrant men and women and 11 health providers           | 87 migrant women from Eritrea, Ethiopia, Somali and Sudan       |
| 55. | Vaughan, C., White, N., Keogh, L., Tobin, J., Murdolo, A., Quiazon, R., & Bayly, C. (2014) <sup>55</sup> | Australia   | To identify the FGC-related service needs prioritised by affected communities living in Victorian regional centres, and to build evidence as to the training, education and professional development required for service providers working in regional Victoria to be able to meet these needs. | Australia Regional Victoria Ballarat, Geelong, Latrobe Valley and Shepparton,<br><br>Research conducted in community meeting rooms | Community based qualitative approach                                                                                                          | Focus group discussions.<br><br>Recruitment from migrant support agencies and then using snowball sampling                                                                                                                           | Thematic analysis           | 51 migrant community members (950 women, 1 man)<br><br>15 health service providers | 50 women from Togo Sudan and Kenya                              |
| 56. | Vloeberghs, E., van der Kwaak, A., Knipscheer, J., & van den Muijsenberg, M. (2012) <sup>56</sup>        | Netherlands | Explored psychosocial and relational problems of African immigrant women in the Netherlands who underwent female genital mutilation/cutting (FGM/C), the causes they attribute to these problems and the way they cope with these health complaints.                                             | In participants' homes                                                                                                             | Mixed-methods study used standardised questionnaires as well as in-depth interviews, and qualitative participatory methods<br>Grounded Theory | In-depth interviews using peer researchers.<br>Snowball sampling used                                                                                                                                                                | Thematic framework analysis | 66 women;<br><br>Age range 18~69                                                   | 66 women from Somalia, Sudan, Eritrea, Ethiopia or Sierra Leone |

| No. | Authors and date                                                                       | Country | Study aims, focus and/or research question                             | Region and Setting (where specified)             | Methodology and/or theoretical perspective | Methods and recruitment (where stated)                                                                   | Data analysis            | Whole study sample                                                            | Eligible participants and country of origin |
|-----|----------------------------------------------------------------------------------------|---------|------------------------------------------------------------------------|--------------------------------------------------|--------------------------------------------|----------------------------------------------------------------------------------------------------------|--------------------------|-------------------------------------------------------------------------------|---------------------------------------------|
| 57. | Wiklund, H., Aden, A. S., Högberg, U., Wikman, M., & Dahlgren, L. (2000) <sup>57</sup> | Sweden  | To study the childbirth experiences of Somali women and men in Sweden. | Umea and nearby municipalities; in women's homes | Grounded theory                            | Interviews were semi-structured. Recruited from the Swedish Medical Birth Register and 'patient' records | Grounded theory analysis | 9 women and 4 husbands of the women studied and additional 3 men; 21-55 years | 9 Somali women                              |

## References of Included Studies

1. Abdi R. Carving culture: Creating identity through female genital cutting. *Durham Anthropology Journal* 2012;18(1):115-53.
2. Abdullahi A, Copping J, Kessel A, et al. Cervical screening: perceptions and barriers to uptake among Somali women in Camden. *Public Health* 2009;123(10):680-5. doi: 10.1016/j.puhe.2009.09.011
3. Ahlberg BM, Krantz I, Lindmark G, et al. 'It's only a tradition': making sense of eradication interventions and the persistence of female 'circumcision' within a Swedish context. *Crit Soc Policy* 2004;24(1):50-78. doi: 10.1107/0261018304039679
4. Ahmed M. Attitudes towards FGM among Somali women living in the UK. In: Momoh C, ed. *Female Genital Mutilation*. London: Radcliffe 2005:95-117.
5. Ameresekere M, Borg R, Frederick J, et al. Somali immigrant women's perceptions of cesarean delivery and patient-provider communication surrounding female circumcision and childbirth in the USA. *Int J Gynecol Obstet* 2011;115(3):227-30. doi: 10.1016/j.ijgo.2011.07.019
6. Asefaw F. [Female Genital Mutilation: A Field Study with Special Consideration of the Background as well as the Health and Psychosexual Consequences for those Affected and their Partners in Eritrea and in Germany] Weibliche Genitalbeschneidung: Eine Feldstudie Unter besonderer Berücksichtigung der Hintergründe Sowie der Gesundheitlichen und Psychosexuellen Folgen für Betroffene und Partner in Eritrea und Deutschland. Humboldt University of Berlin, 2007.
7. Baldeh F. Obstetric Care in Scotland: The Experience of Women who have Undergone Female Genital Mutilation (FGM) [MSc Thesis]. Queen Margaret University, 2013.
8. Ballesteros Meseguer C, Almansa Martinez P, Pastor Bravo MdM, et al. [The voice of women subjected to female genital mutilation in the region of Murcia, Spain] La Voz de las mujeres sometidas a mutilacion genital femenina en la region de Murcia. *Gac Sanit* 2014;28(4):287-91. doi: 10.1016/j.gaceta.2014.02.006
9. Behrendt A. Listening to African Voices: Female Genital Mutilation/Cutting among Immigrants in Hamburg: Knowledge, Attitudes and Practice. Hamburg, Germany: Plan, 2011.
10. Beine K, Fullerton J, Palinkas L, et al. Conceptions of prenatal care among Somali women in San Diego. *J Nurs Midwifery* 1995;40(4):376-81. doi: Doi 10.1016/0091-2182(95)00024-E
11. Berggren V, Bergstrom S, Edberg A-K. Being different and vulnerable: experiences of immigrant African women who have been circumcised and sought maternity care in Sweden. *J Transcult Nurs* 2006;17(1):50-7. doi: 10.1177/1043659605281981
12. Betts V. Transnational Gender, Sexuality and Identity Construction: Ambivalent Subjectivities of Somali Refugee Women in the GTA. MA Thesis, The University of Guelph, 2011.

13. Bravo Pastor del Mar M. [Women Subjected to Female Genital Mutilation: Knowledge for the Nursing Discipline] *La Voz de las Mujeres Sometidas a Mutilación Genital Femenina: Saberes Para la Disciplina Enfermera* [Tesis Doctoral]. University of Murcia, 2014.
14. Bulman KH, McCourt C. Somali refugee women's experiences of maternity care in west London: a case study. *Crit Public Health* 2002;12(4):365-80.
15. Carroll J, Epstein R, Fiscella K, et al. Caring for Somali women: implications for clinician-patient communication. *Patient Educ Couns* 2007;66(3):337-45. doi: 10.1016/j.pec.2007.01.008
16. Chalmers B, Omer-Hashi K. What Somali women say about giving birth in Canada. *J Reprod Infant Psychol* 2002;20(4):267-82. doi: 10.1080/0264683021000033183
17. Degni F, Suominen SB, El Ansari W, et al. Reproductive and maternity health care services in Finland: perceptions and experiences of Somali-born immigrant women. *Ethn Health* 2014;19(3):348-66. doi: 10.1080/13557858.2013.797567
18. d'Entremont M, Smythe L, McAra-Couper J. The sounds of silence: a hermeneutic interpretation of childbirth post excision. *Health Care Women Int* 2014;35(3):300-19. doi: 10.1080/07399332.2013.838245
19. Essén B, Johnsdotter S, Hovelius B, et al. Qualitative study of pregnancy and childbirth experiences in Somalian women resident in Sweden. *Br J Obstet Gynaecol* 2000;107(12):1507-12.
20. Fawcett L. Somali Refugee Women and their U.S. Healthcare Providers: Knowledge, Perceptions and Experiences of Childbearing [Doctor of Philosophy]. Arizona State University, 2014.
21. Gali MA. Female Circumcision: A Transcultural Study of Attitudes, Identity and Reproductive Health of East African Immigrants [Degree of Doctor of Philosophy in Psychology]. The Wright Institute, University of Berkeley, 1997.
22. Ghebre RG, Sewali B, Osman S, et al. Cervical cancer: barriers to screening in the Somali community in Minnesota. *J Immigr Minor Health* 2015;17(3):722-28. doi: 10.1007/s10903-014-0080-1
23. Glazer E. Embodiment, Pain and Circumcision in Somali-Canadian Women [M.Sc.]. University of Toronto, 2012.
24. Glover J, Liebling H, Barrett H, et al. The psychological and social impact of female genital mutilation: a holistic conceptual framework. *J Int Stud* 2017;10(2):219-38.
25. Guerin PB, Allotey P, Elmi FH, et al. Advocacy as a means to an end: assisting refugee women to take control of their reproductive health needs. *Women Health* 2006;43(4):7-25.
26. Hill N, Hunt E, Hyrkas K. Somali immigrant women's health care experiences and beliefs regarding pregnancy and birth in the United States. *J Transcult Nurs* 2012;23(1):72-81. doi: 10.1177/1043659611423828 [published Online First: 2011/11/05]

27. Hussein E. Women's Experiences, Perceptions and Attitudes of Female Genital Mutilation: The Bristol PEER Study. London: FORWARD, 2010.
28. Hussen MA. Services for Women with Female Genital Mutilation in Christchurch: Perspectives of Women and their Health Providers. University of Canterbury, 2014.
29. Johansen RE. Undoing female genital cutting: perceptions and experiences of infibulation, defibulation and virginity among Somali and Sudanese migrants in Norway. *Cult Health Sex* 2017;19(4):528-42. doi: 10.1080/13691058.2016.1239838
30. Jones A. Working Psychologically with Female Genital Mutilation: An Exploration of the Views and Experiences of Women who have Experienced FGM and of Clinical Psychologists. University of East London, 2010.
31. Khaja K. Female Circumcision: Life Histories of Somali Women [Doctor of Philosophy]. The University of Utah, 2004.
32. Khaja K, Lay K, Boys S. Female circumcision: toward an inclusive practice of care. *Health Care Women Int* 2010;31(8):686-99. doi: 10.1080/07399332.2010.490313
33. Lundberg PC, Gereziher A. Experiences from pregnancy and childbirth related to female genital mutilation among Eritrean immigrant women in Sweden. *Midwifery* 2008;24(2):214-25. doi: 10.1016/j.midw.2006.10.003
34. Maier C. [Echoes of Silence: Voices of Concern for Genital Mutilation in African Immigrant Women in Vienna: An Ethnological Study] Echo des Schweigens: Stimmen der Betroffenheit zur Genitalverstümmelung bei Afrikanischen Immigrantinnen in Wien: Ethnologische Studie. University of Vienna, 2003.
35. Maternity Action. Women's Voices on Health: Addressing Barriers to Accessing Primary Care. London: Women's Health and Equality Consortium, 2014.
36. McNeely S, Christie-de Jong F. Somali refugees' perspectives regarding FGM/C in the US. *Int J Migr Health Soc Care* 2016;12(3):157-69. doi: 10.1108/Ijmhsc-09-2015-0033
37. Moxey JM, Jones LL. A qualitative study exploring how Somali women exposed to female genital mutilation experience and perceive antenatal and intrapartum care in England. *BMJ Open* 2016;6(1):e009846. doi: 10.1136/bmjopen-2015-009846
38. Murray L, Windsor C, Parker E, et al. The experiences of African women giving birth in Brisbane, Australia. *Health Care Women Int* 2010;31(5):458-72. doi: 10.1080/07399330903548928
39. Norman K, Gegzabher SB, Otoo-Oyortey N. "Between Two Cultures": A Rapid PEER Study Exploring Migrant Communities' Views on Female Genital Mutilation in Essex and Norfolk, UK. FORWARD & National FGM Centre Report, , 2016.
40. Norman K, Hemmings J, Hussein E, et al. "FGM is Always With Us": Experiences, Perceptions and Beliefs of Women Affected by Female Genital Mutilation in London: Results from a PEER Study. London: Options Consultancy Services and FORWARD, 2009.

41. O'Brien O, Baldeh F, Hassan J, et al. My Voice: Participatory Action Research Project with Men, Women and Young People on Female Genital Mutilation (FGM) in Scotland: (Phase 2). Waverly Care, Edinburgh: Queen Margaret University, 2017.
42. O'Brien O, Baldeh F, Sivapatham S, et al. Participatory Action Research Project with Men, Women and Young People on Female Genital Mutilation (FGM) in Scotland: (Phase 1). Waverly Care, Edinburgh: Queen Margaret University, 2016.
43. Palfreyman A, Brown E, Nam S. Understanding Female Genital Mutilation in Birmingham: Findings from a PEER Study: Options Consultancy Services and Birmingham & Solihull Women's Aid, 2011.
44. Recchia N, McGarry J. "Don't judge me": narratives of living with FGM. *Int J Hum Rights Healthc* 2017;10(1):4-13. doi: 10.1108/Ijhrh-10-2016-0016
45. Safari F. A qualitative study of women's lived experience after deinfibulation in the UK. *Midwifery* 2013;29(2):154-8. doi: 10.1016/j.midw.2011.12.005
46. Salad J, Verdonk P, de Boer F, et al. "A Somali girl is Muslim and does not have premarital sex - is vaccination really necessary?" A qualitative study into the perceptions of Somali women in the Netherlands about the prevention of cervical cancer. *Int J Equity Health* 2015;14(1):1-13. doi: 10.1186/s12939-015-0198-3
47. Shaw E. Female circumcision: perceptions of clients and caregivers. *J Am Coll Health* 1985;33(5):193-7. doi: 10.1080/07448481.1985.9939604
48. Shermarke MAA. Understanding the Canadian Community Context of Female Circumcision [M.S.W.]. McGill University, 1996.
49. Straus L, McEwen A, Hussein FM. Somali women's experience of childbirth in the UK: perspectives from Somali health workers. *Midwifery* 2009;25(2):181-6. doi: 10.1016/j.midw.2007.02.002
50. Thierfelder C. Female Genital Mutilation and the Swiss Health Care System. University of Basel, 2003.
51. Thierfelder C, Tanner M, Bodiang CMK. Female genital mutilation in the context of migration: experience of African women with the Swiss health care system. *Eur J Public Health* 2005;15(1):86-90. doi: 10.1093/eurpub/cki120
52. Upvall MJ, Mohammed K, Dodge PD. Perspectives of Somali Bantu refugee women living with circumcision in the United States: a focus group approach. *Int J Nurs Stud* 2009;46(3):360-8. doi: 10.1016/j.ijnurstu.2008.04.009
53. Vangen S, Johansen REB, Sundby J, et al. Qualitative study of perinatal care experiences among Somali women and local health care professionals in Norway. *Eur J Obstet Gynecol Reprod Biol* 2004;112(1):29-35. doi: 10.1016/S0301-2115(03)00313-0
54. Vaughan C, White N, Keogh L, et al. Listening to North Yarra Communities about Female Genital Cutting. Melbourne, Australia: The University of Melbourne, 2014.

55. Vaughan C, White N, Keogh L, et al. Female Genital Mutilation/Cutting in Regional Victoria. Research to Practice. Melbourne, Australia: The University of Melbourne, 2014.
56. Vloeberghs E, van der Kwaak A, Knipscheer J, et al. Coping and chronic psychosocial consequences of female genital mutilation in the Netherlands. *Ethn Health* 2012;17(6):677-95. doi: 10.1080/13557858.2013.771148
57. Wiklund H, Aden AS, Högberg U, et al. Somalis giving birth in Sweden: a challenge to culture and gender specific values and behaviours. *Midwifery* 2000;16(2):105-15. doi: <http://dx.doi.org/10.1054/midw.1999.0197>
